# Supplementary material for: Postmortem Interval Influencesα-Synuclein Expression in Parkinson Disease Brain
Source: Hindawi journal article supplement (doi:10.1155/2012/614212), 2012-01-01
Supplement: f1 [file 614212.f1.pdf]

**Supplementary Material**

**Supplementary Table 1:** *Encoding of AD variable for the final sample using neuropathological information*

| <b>AD Value</b> | <b>LA</b>                                                                                  | <b>McLean</b>                                                                | <b>Sun Health</b>                                                                      |
|-----------------|--------------------------------------------------------------------------------------------|------------------------------------------------------------------------------|----------------------------------------------------------------------------------------|
| <b>2</b>        | Information in the Neuropathological Diagnosis and in the Microscopic Examination sections | Abundant plaques in the hippocampus region<br>Age and Braak stage considered | Plaque Total $\geq 4.5$<br>Braak $\geq 4$<br>or<br>Plaque Total $\geq 10$<br>Braak = 3 |
|                 | 1 PD, 0 controls                                                                           | 3 PD, 0 controls                                                             | 6 PD*, 0 controls                                                                      |
| <b>1</b>        | Information in the Neuropathological Diagnosis and in the Microscopic Examination sections | Moderate plaques in the hippocampus region<br>Age and Braak stage considered | Plaque Total $\geq 4.5$<br>Braak = 3<br>or<br>Plaque Total $\geq 8$<br>Braak = 2       |
|                 | 2 PD, 1 control                                                                            | 13 PD, 5 controls                                                            | 9 PD, 0 controls                                                                       |
| <b>0</b>        | No evidence for plaques                                                                    |                                                                              |                                                                                        |
|                 | 14 PD, 1 control                                                                           | 19 PD, 34 controls                                                           | 33 PD, 23 controls                                                                     |

*\*all 6 brains had B Cerad Neuritic Plaque scores assigned to them*

Post-mortem Interval Influences  $\alpha$ -Synuclein Expression in Parkinson Disease Brain

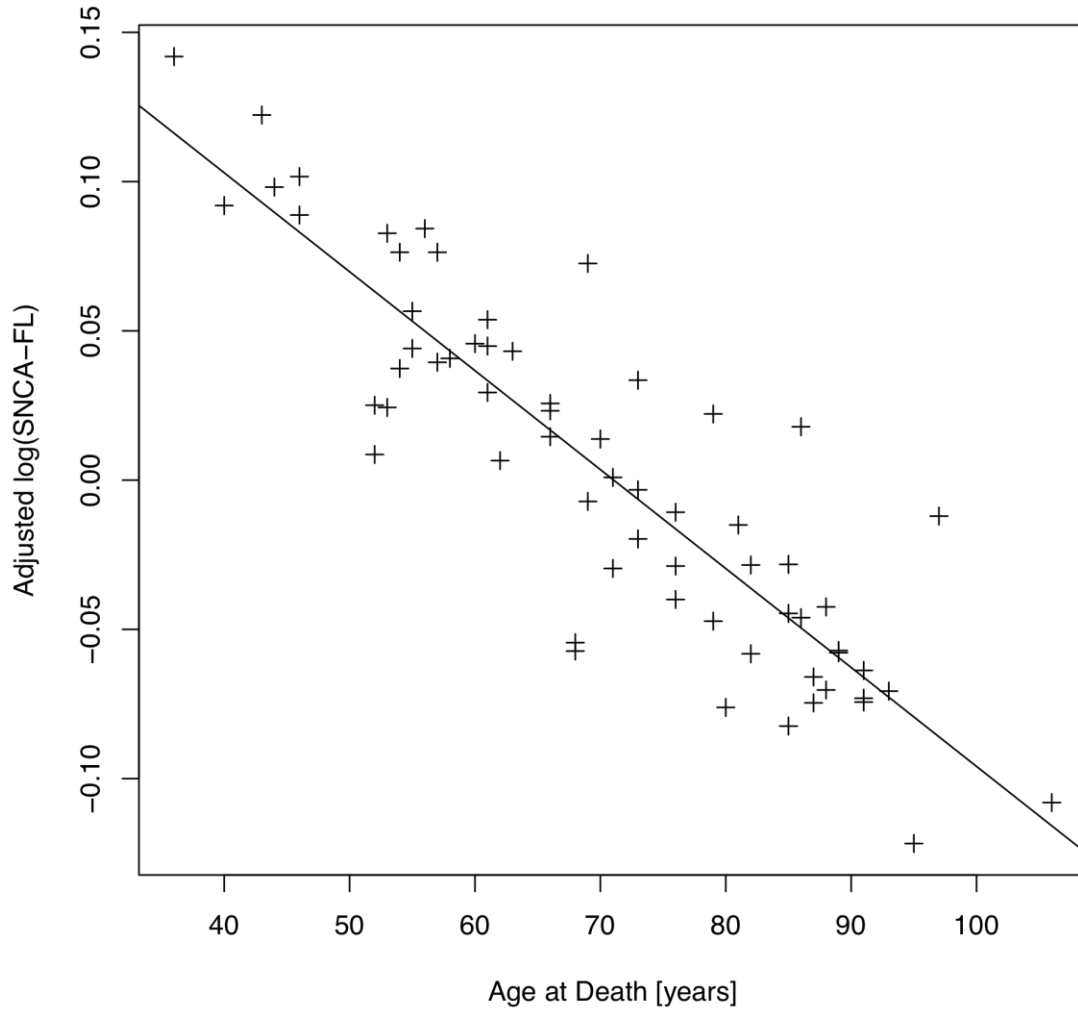

**Supplementary Figure 1:** Age at death versus SNCA-FL expression values adjusted for pH, PMI, and sex in 64 controls.

Post-mortem Interval Influences  $\alpha$ -Synuclein Expression in Parkinson Disease Brain

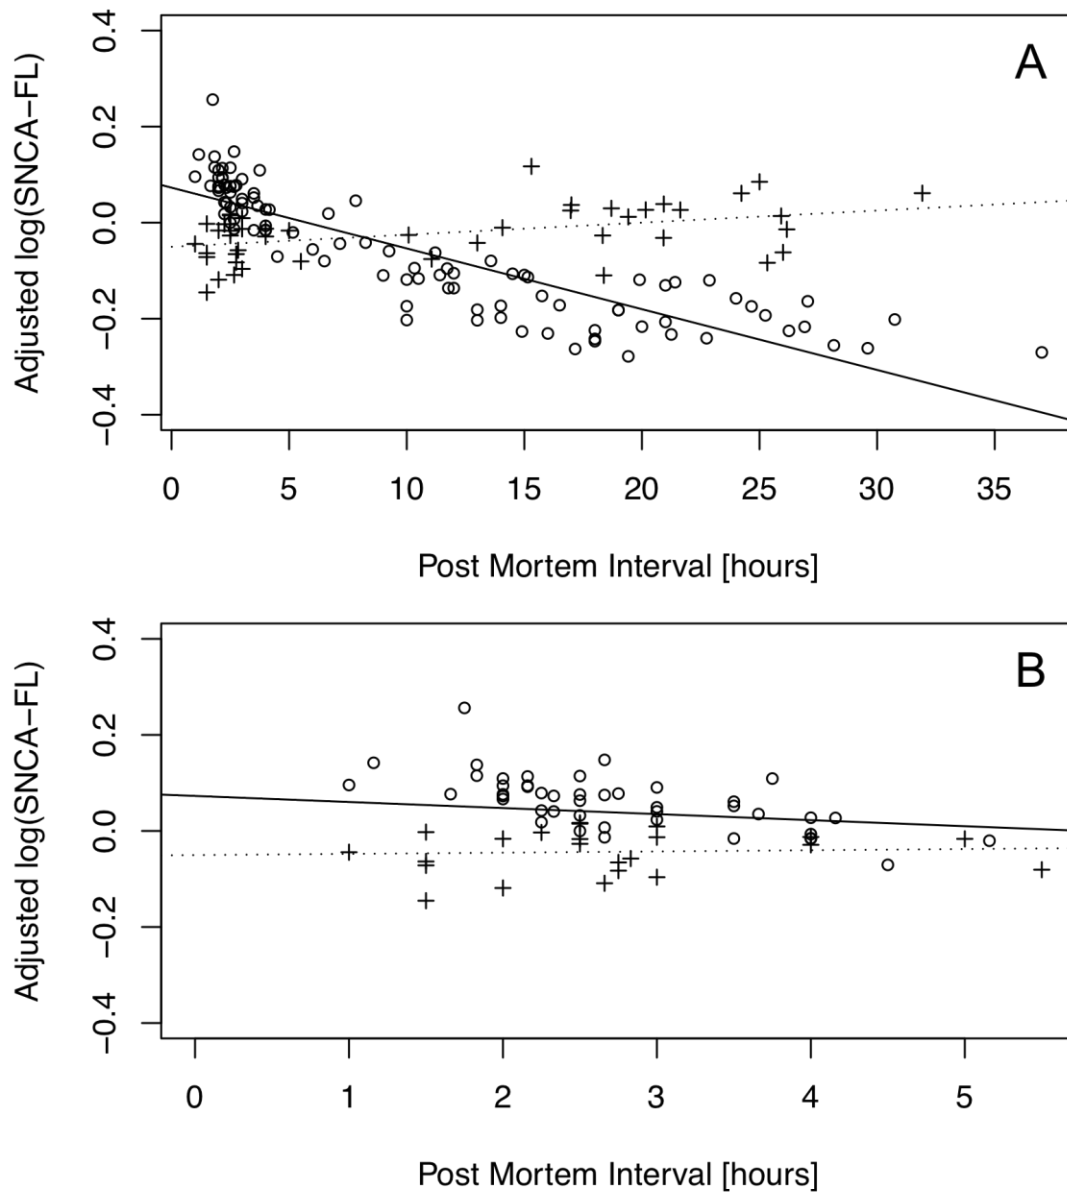

**Supplementary Figure 2:** Adjusted SNCA-FL expression values by PMI for A) all samples and B) only samples with PMI less or equal to 5.5 hours. Controls are depicted as crosses (dotted regression line) and PD samples as circles (solid regression line).
